# Supplementary material for: Prediction of Response and Survival Following Treatment with Azacitidine for Relapse of Acute Myeloid Leukemia and Myelodysplastic Syndromes after Allogeneic Hematopoietic Stem Cell Transplantation
Source: PubMed Central journal article supplement (PMC7464210; doi:10.3390/cancers12082255), 2020-08-12
Supplement: cancers-12-02255-s001.pdf [file cancers-12-02255-s001.pdf]

Supplemental Material

Supplemental Figure 1. Landmarkanalysis regarding OS of patients who received DLI compared to those who did not. As the median time to application of first DLI were 55 days, this time point was chosen as a landmark for survival analyses.

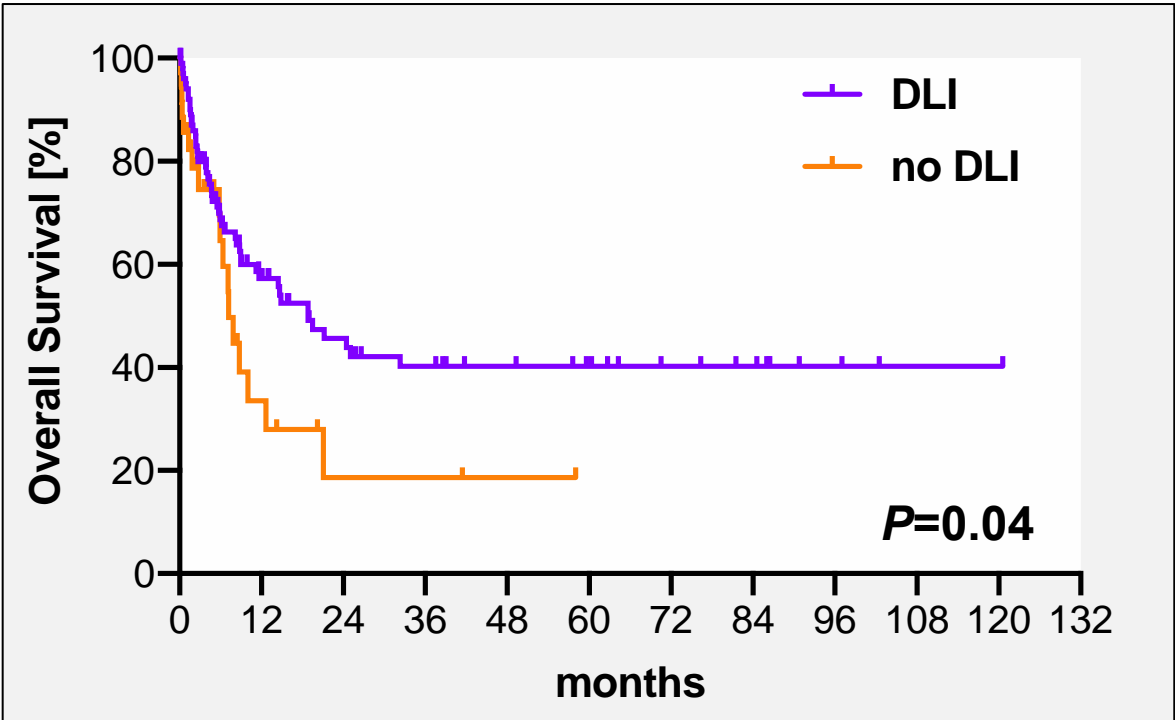

**Supplement Figure 2. Overall survival (OS) after treatment with Azacitidine ± DLI in 77 patients with AML and MDS treated with Azacitidine/DLI for hematologic relapse after allo-HSCT according to the Aza Relapse Prognostic Score (11).**

The time between transplant and relapse was assigned with 2 points if less than six months, 1 if 6-12 months and 0 if greater than 12 months. A blast percentage greater than the median (20%) at relapse was assigned 1 point, while a blast percentage below 20% was assigned with 0 points.

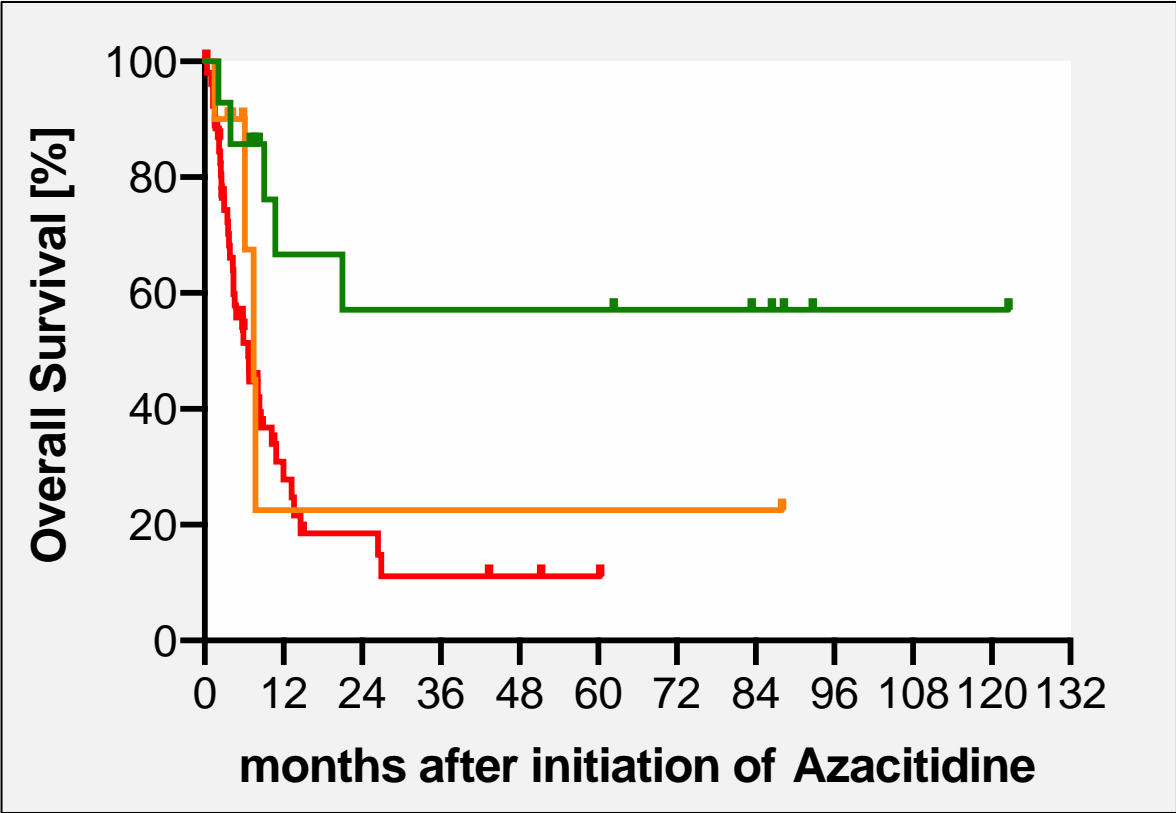

**group 1 vs. group 2,  $P = 0.13$**

**group 2 vs. group 3,  $P = 0.36$**

**Supplemental Table 1. Conditioning regimen**

|                            | <b>All patients</b> | <b>upfront</b> | <b>CTX</b> | <b>HMA</b> |
|----------------------------|---------------------|----------------|------------|------------|
| <b>No.</b>                 | 147                 | 43             | 90         | 14         |
| <b>Conditioning, n (%)</b> |                     |                |            |            |
| FLAMSA-Melphalan           | 75 (51)             | 28 (65)        | 41 (46)    | 6 (43)     |
| FLAMSA-Treosulfan          | 9 (6)               | 2 (5)          | 7 (8)      | -          |
| Fludarabine-Treosulfan     | 25 (17)             | 5 (12)         | 14 (16)    | 6 (43)     |
| Fludarabine-Busulfan       | 15 (10)             | 6 (14)         | 9 (10)     | -          |
| Fludarabine-TBI            | 2 (1)               | 1 (2)          | 1 (1)      | -          |
| Busulfan-Cyclophosphamid   | 5 (3)               | -              | 5 (6)      | -          |
| Other                      | 15 (10)             | 1 (2)          | 12 (13)    | 2 (14)     |
| Missing information        | 1 (1)               | -              | 1 (1)      | -          |

Information about pretransplant strategy missing in 4 patients.

**Supplement Table 2: Impact of Clinical Parameters on Response and Outcome after Treatment with Azacitidine for post-transplant sAML<sup>#</sup> and MDS relapse – Univariate and Multivariate Analysis (n=66)**

| Variable                            | Overall Survival                      |            |              | Response                              |            |              |
|-------------------------------------|---------------------------------------|------------|--------------|---------------------------------------|------------|--------------|
|                                     | 2-yr OS after commencement of Aza (%) | P          |              | CR Rate after commencement of Aza (%) | P          |              |
|                                     |                                       | Univariate | Multivariate |                                       | Univariate | Multivariate |
| <b>Age</b>                          |                                       |            |              |                                       |            |              |
| ≥ 60 yrs                            | 34.4 ± 9                              | 0.1811     | -            | 33                                    | 0.5102     | -            |
| < 60 yrs                            | 42.7 ± 9                              |            |              | 41                                    |            |              |
| <b>Gender</b>                       |                                       |            |              |                                       |            |              |
| Female                              | 30.4 ± 10                             | 0.2252     | -            | 26                                    | 0.0516     | 0.003        |
| Male                                | 44.8 ± 8                              |            |              | 47                                    |            |              |
| <b>Karyotype</b>                    |                                       |            |              |                                       |            |              |
| Abnormal                            | 32.6 ± 8                              | 0.1513     | -            | 32                                    | 0.4722     | -            |
| Normal                              | 56.2 ± 12                             |            |              | 41                                    |            |              |
| <b>Karyotype</b>                    |                                       |            |              |                                       |            |              |
| Complex                             | 26 ± 9                                | 0.1541     | 0.021        | 31                                    | 0.3692     | -            |
| Not complex                         | 47.3 ± 9                              |            |              | 41                                    |            |              |
| <b>Cytogenetic risk*</b>            |                                       |            |              |                                       |            |              |
| Poor/very poor                      | 26.6 ± 9                              | 0.1338     | -            | 33                                    | 0.3843     | -            |
| Very low/low/int                    | 48.1 ± 9                              |            |              | 43                                    |            |              |
| <b>Disease status at transplant</b> |                                       |            |              |                                       |            |              |
| No CR                               | 44.6 ± 8                              | 0.4959     | -            | 41                                    | 0.5965     | -            |
| CR                                  | 33.3 ± 15                             |            |              | 32                                    |            |              |
| <b>Pretransplant strategy</b>       |                                       |            |              |                                       |            |              |
| Treated                             | 25.3 ± 6                              | 0.0004     | 0.009        | 28                                    | 0.0130     | 0.006        |
| Upfront                             | 63.5 ± 10                             |            |              | 56                                    |            |              |
| <b>Donor</b>                        |                                       |            |              |                                       |            |              |
| Unrelated                           | 44.6 ± 7                              | 0.8631     | -            | 39                                    | 0.9999     | -            |
| Related                             | 18.3 ± 16                             |            |              | 35                                    |            |              |
| <b>HLA-Match</b>                    |                                       |            |              |                                       |            |              |
|                                     |                                       |            | -            |                                       |            |              |

|                                  |           |        |       |    |        |       |
|----------------------------------|-----------|--------|-------|----|--------|-------|
| Mismatched                       | 37.2 ± 11 | 0.6139 |       | 31 | 0.4748 | -     |
| Matched                          | 38.9 ± 8  |        |       | 42 |        |       |
| <b>Conditioning<sup>  </sup></b> |           |        |       |    |        |       |
| RIC                              | 30.7 ± 8  | 0.2975 | -     | 32 | 0.1185 | -     |
| Standard dose                    | 48.7 ± 10 |        |       | 50 |        |       |
| <b>Type of relapse</b>           |           |        |       |    |        |       |
| Hematologic                      | 33.9 ± 8  | 0.0232 | ns    | 27 | 0.0086 | 0.002 |
| Molecular                        | 50.6 ± 12 |        |       | 56 |        |       |
| <b>Time until relapse</b>        |           |        |       |    |        |       |
| <6 months                        | 32.4 ± 9  | 0.0106 | ns    | 46 | 0.1333 | -     |
| ≥6 months                        | 52.7 ± 10 |        |       | 54 |        |       |
| <b>BM blasts at relapse</b>      |           |        |       |    |        |       |
| >8% (median)                     | 33 ± 10   | 0.0012 | 0.001 | 24 | 0.0070 | -     |
| ≤8%                              | 47.3 ± 9  |        |       | 54 |        |       |

#besides MDS only patients with sAML with 20-29% BM blasts (formerly RAEB-T) were included

\*according to Greenberg et al. (20)

<sup>||</sup>according to Bacigalupo et al. (21)

- indicates that the respective parameter was not included into multivariate model

AML, acute myeloid leukemia; Aza, Azacitidine; BM, bone marrow; CR, complete remission; HLA, human leukocyte antigen; int, intermediate; MDS, myelodysplastic syndrome; ns, no statistical significance; RIC, reduced intensity conditioning; yr, years; yrs, years

**Supplement Table 3: Two-year overall survival and response rate of 77 patients with AML and MDS treated with Azacitidine ± DLI for hematologic relapse after allo-HSCT according to the Aza Relapse Prognostic Score (11)**

| <b>Risk Score/<br/>Group</b> | <b>Response Rate (CR)<br/>after Azacitidine</b> | <b>2-yr OS Rate<br/>after Azacitidine [<math>\pm</math> SEM]</b> |
|------------------------------|-------------------------------------------------|------------------------------------------------------------------|
| <b>1 (n=14)</b>              | 57%                                             | 57% $\pm$ 15%                                                    |
| <b>2 (n=10)</b>              | 40%                                             | 23% $\pm$ 20%                                                    |
| <b>3 (n=53)</b>              | 18%                                             | 19% $\pm$ 6%                                                     |
|                              | <i>P</i> = 0.01                                 | <i>P</i> = 0.01                                                  |

Allo-HSCT, allogeneic hematopoietic stem cell transplantation; AML, acute myeloid leukemia; BM, bone marrow; CR, complete remission; DLI, donor lymphocyte infusion; MDS, myelodysplastic syndrome; OS, overall survival; sAML, secondary AML; SEM, standard error of the mean; yr, year

The time between transplant and relapse was assigned with 2 points if less than six months, 1 if 6-12 months and 0 if greater than 12 months. A blast percentage greater than the median (20%) at relapse was assigned 1 point, while a blast percentage below 20% was assigned with 0 points.
